# Supplementary material for: Functional consequences of Caribbean coral reef habitat degradation
Source: Copernicus journal article supplement (doi:10.5194/bg-2021-64), 2021-03-23
Supplement: Supplementary file 1 [file Figure_S1.pdf › Supplement/Figure_S1.pdf]

**DIC**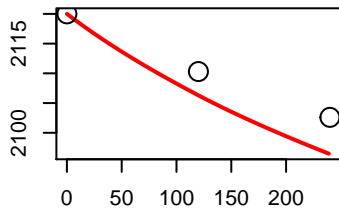

time, min

**NH4**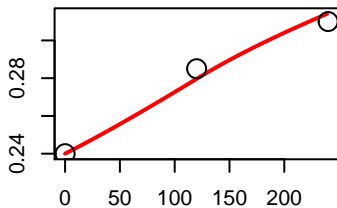

time, min

**NO3**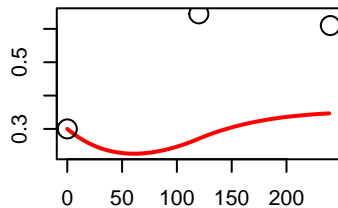

time, min

**AT**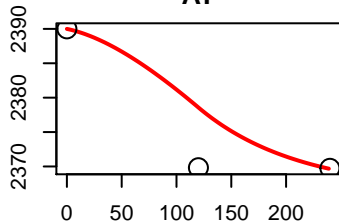

time, min

**O2**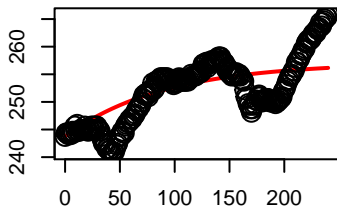

time, min

CORAL DAY 1

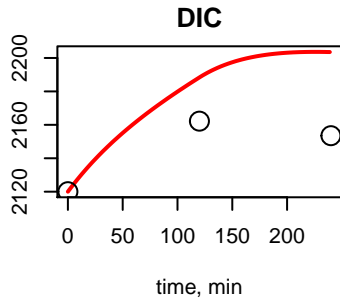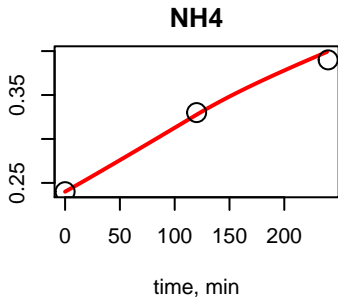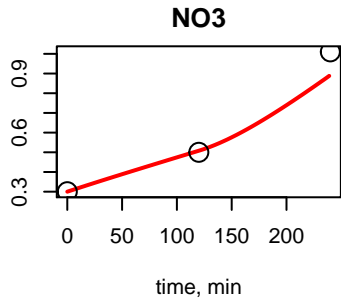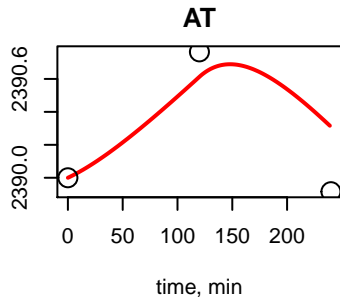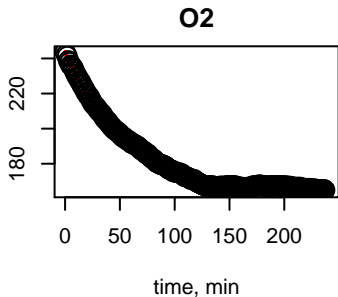

CORAL NIGHT 1

**DIC**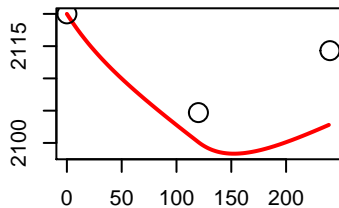

time, min

**NH4**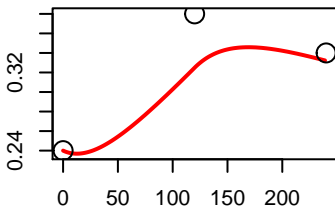

time, min

**NO3**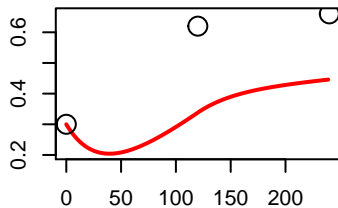

time, min

**AT**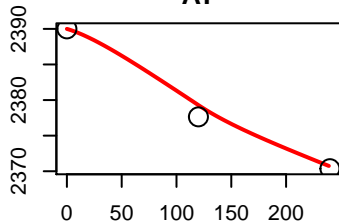

time, min

**O2**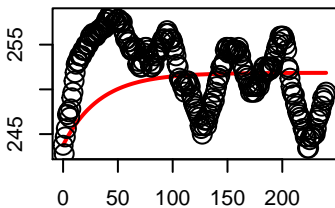

time, min

CORAL DAY 2

**DIC**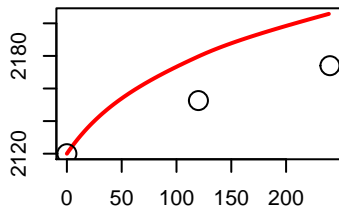

time, min

**NH4**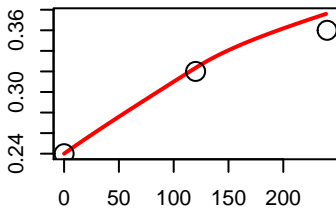

time, min

**NO3**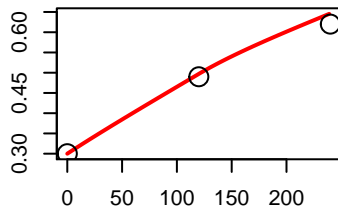

time, min

**AT**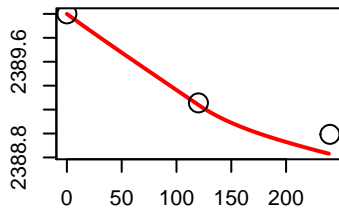

time, min

**O2**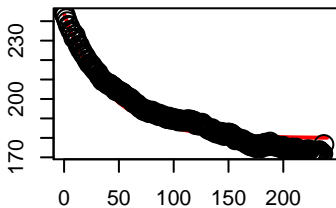

time, min

CORAL NIGHT 2

**DIC**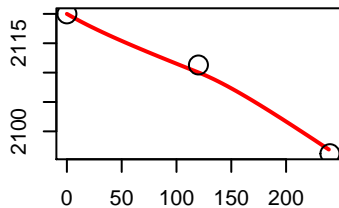

time, min

**NH4**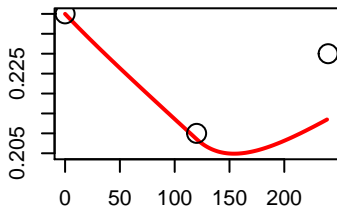

time, min

**NO3**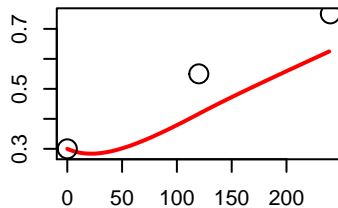

time, min

**AT**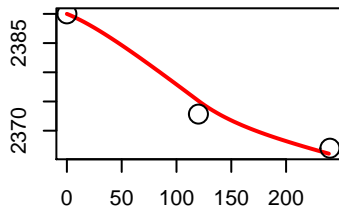

time, min

**O2**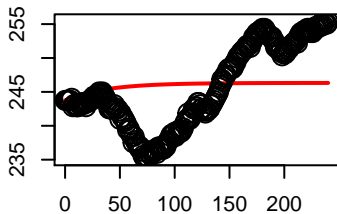

time, min

CORAL DAY 3

**DIC**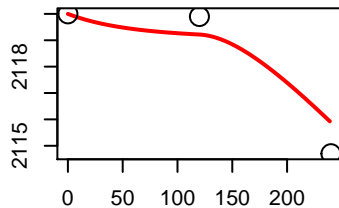

time, min

**NH4**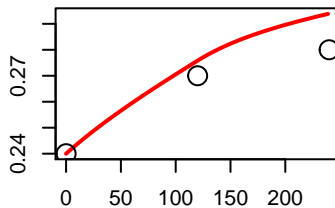

time, min

**NO3**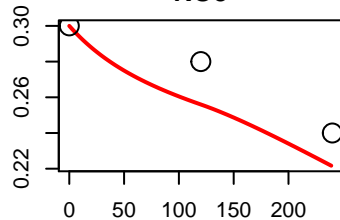

time, min

**AT**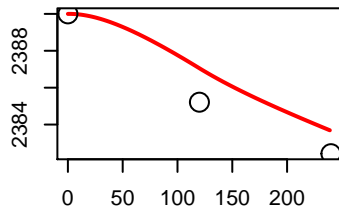

time, min

**O2**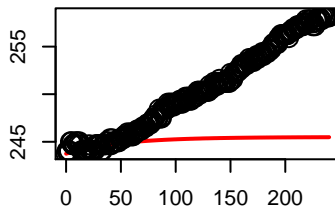

time, min

TMA DAY 1

**DIC**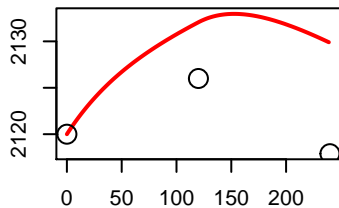

time, min

**NH4**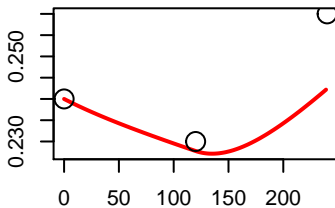

time, min

**NO3**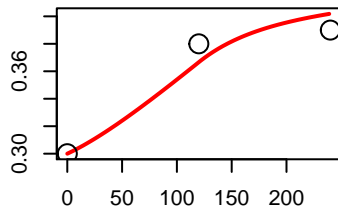

time, min

**AT**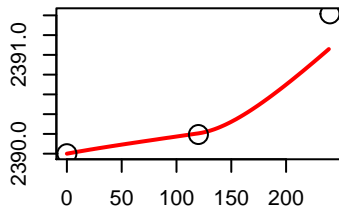

time, min

**O2**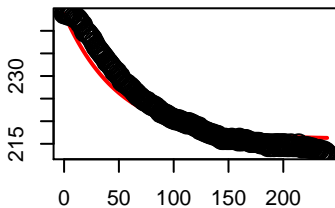

time, min

TMA NIGHT 1

**DIC**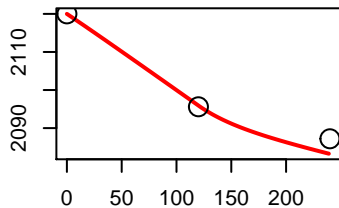

time, min

**NH<sub>4</sub>**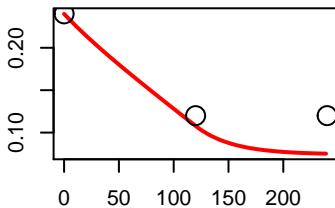

time, min

**NO<sub>3</sub>**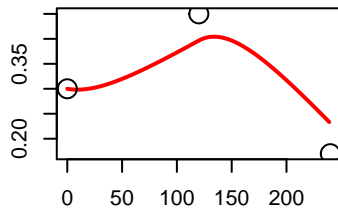

time, min

**AT**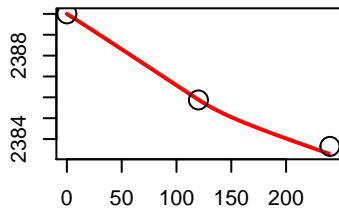

time, min

**O<sub>2</sub>**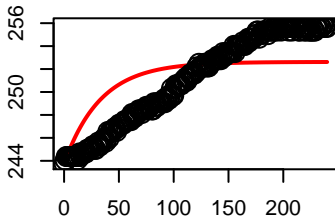

time, min

TMA DAY 3



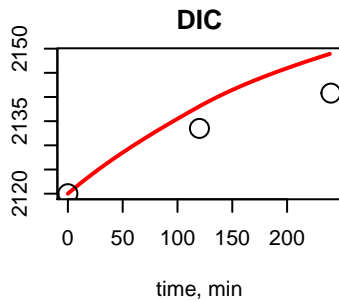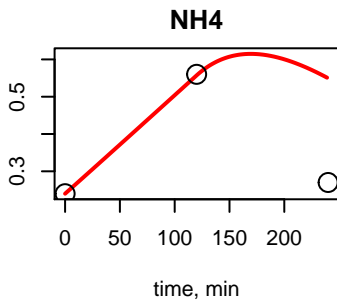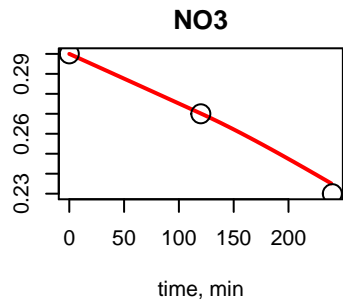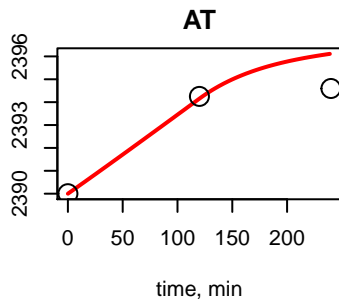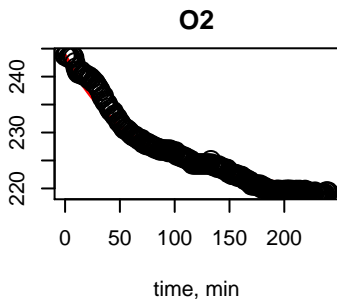

TMA NIGHT 2

**DIC**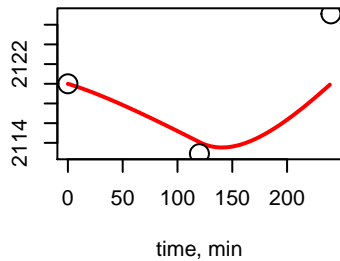**NH4**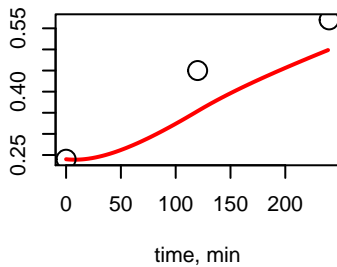**NO3**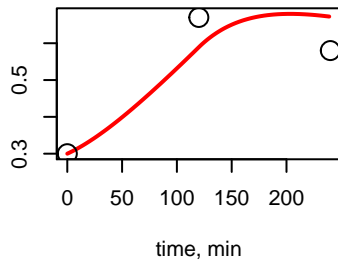**AT**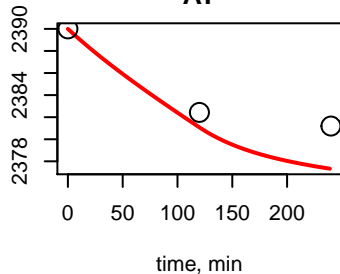**O2**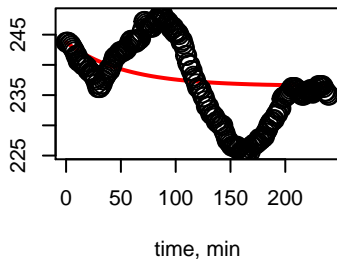

BES DAY 1

**DIC**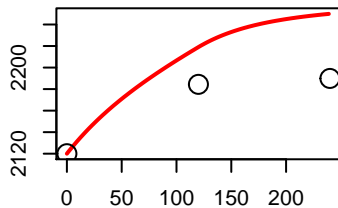

time, min

**NH4**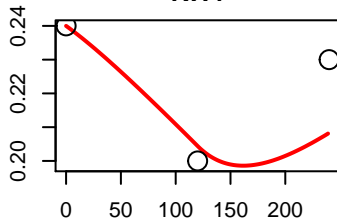

time, min

**NO3**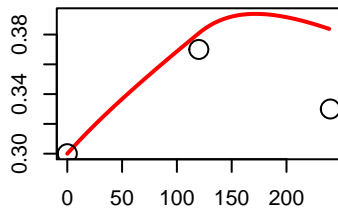

time, min

**AT**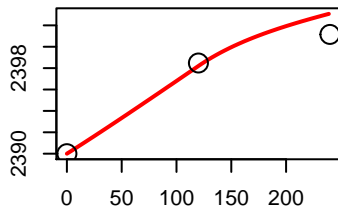

time, min

**O2**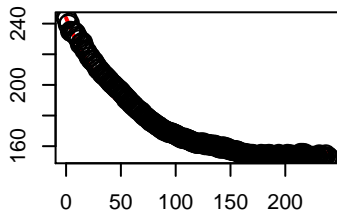

time, min

BES NIGHT 1

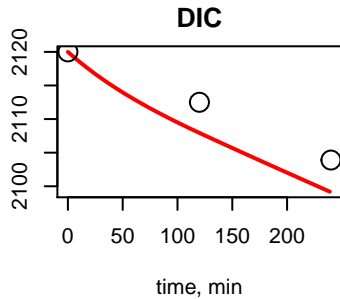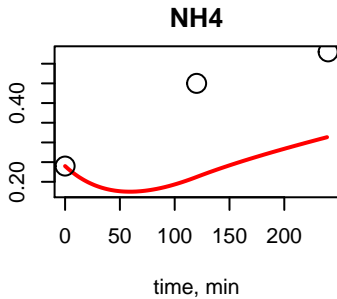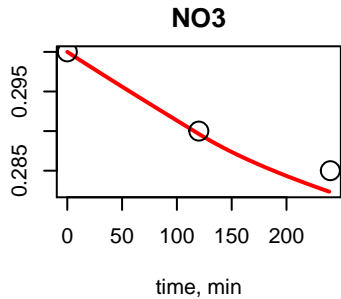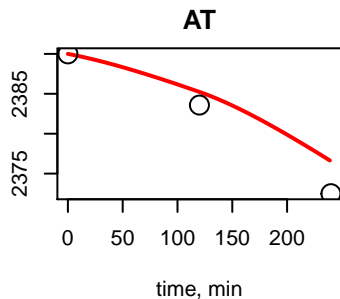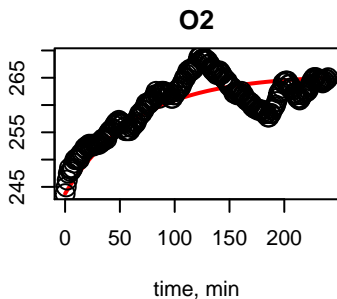

BES DAY 2

**DIC**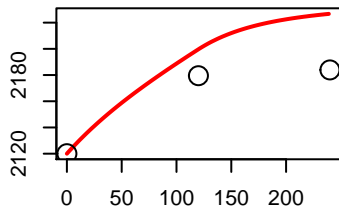

time, min

**NH4**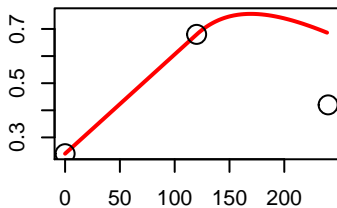

time, min

**NO3**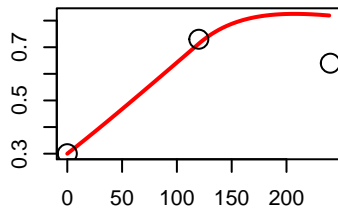

time, min

**AT**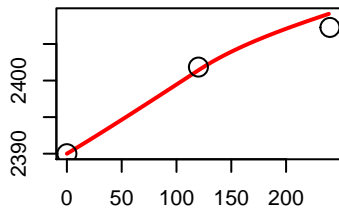

time, min

**O2**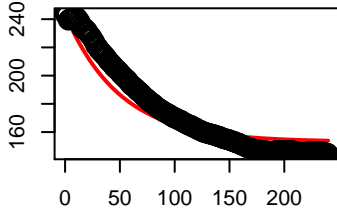

time, min

**BES NIGHT 2**

**DIC**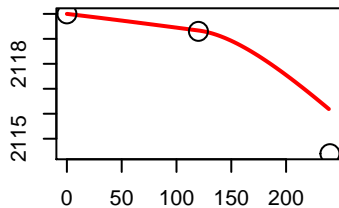

time, min

**NH4**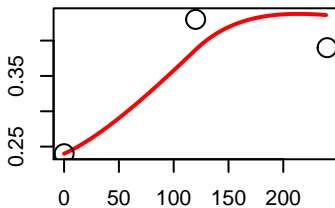

time, min

**NO3**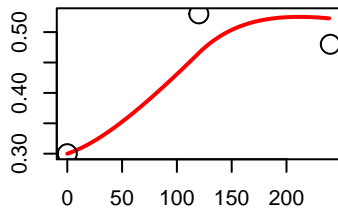

time, min

**AT**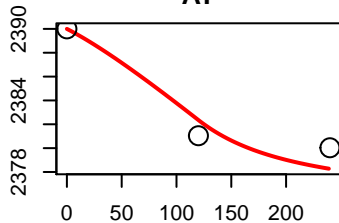

time, min

**O2**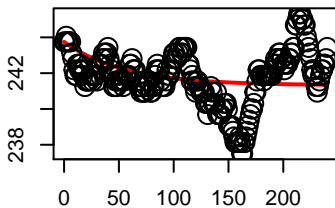

time, min

BES DAY 3

**DIC**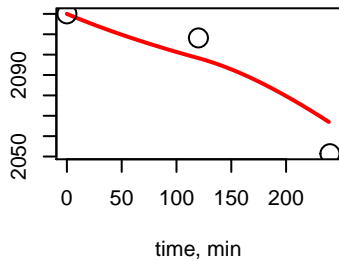**NH4**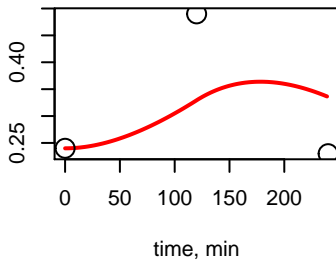**NO3**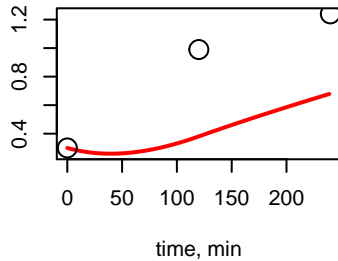**AT**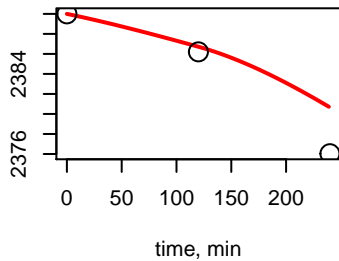**O2**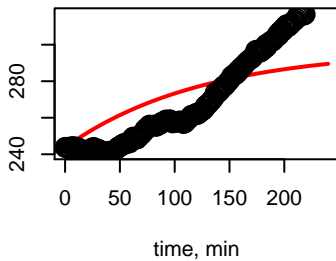

CYANO DAY 1

**DIC**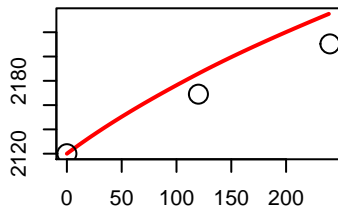

time, min

**NH4**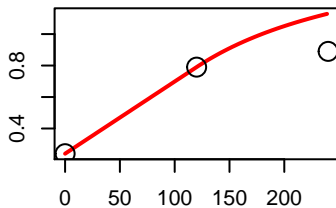

time, min

**NO3**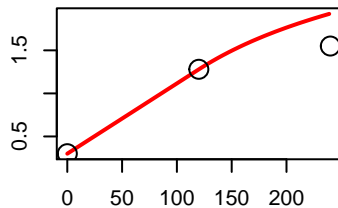

time, min

**AT**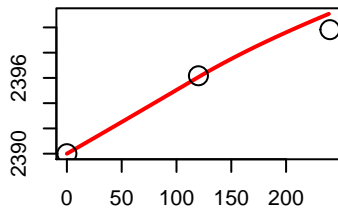

time, min

**O2**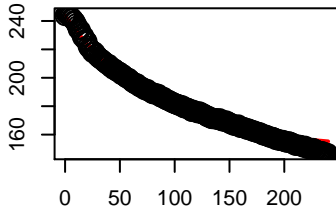

time, min

CYANO NIGHT 1



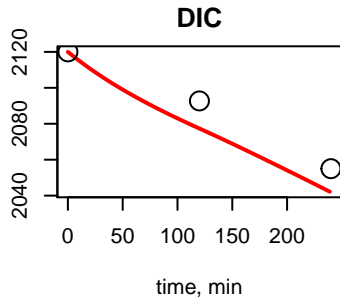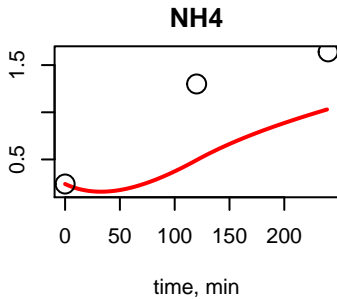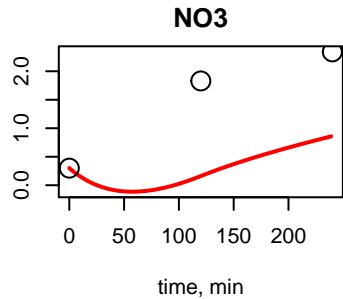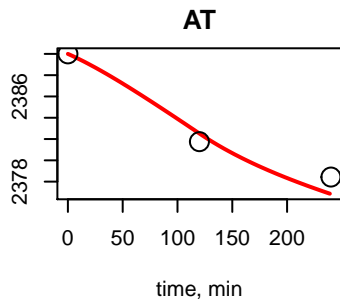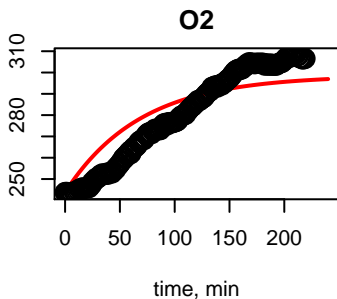

CYANO DAY 2

**DIC**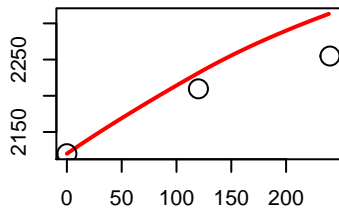

time, min

**NH4**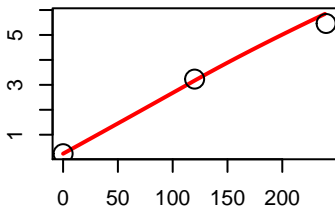

time, min

**NO3**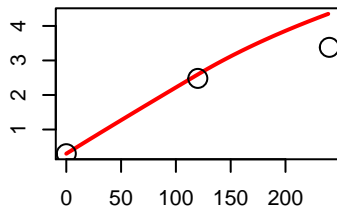

time, min

**AT**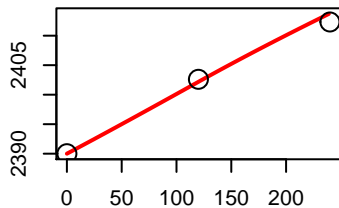

time, min

**O2**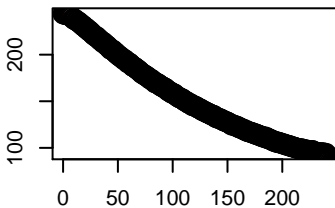

time, min

CYANO NIGHT 2

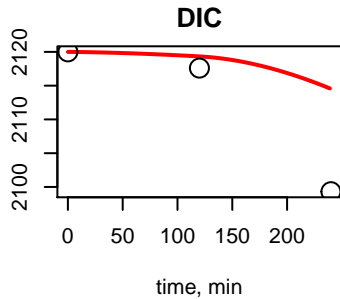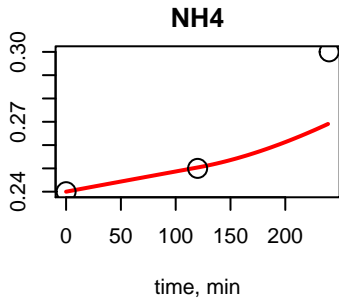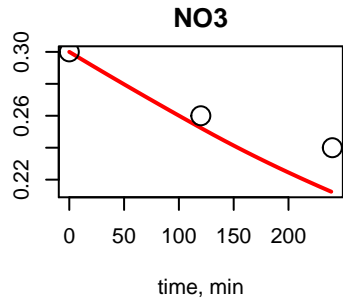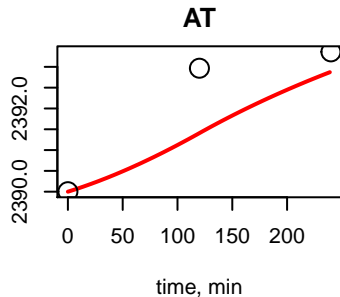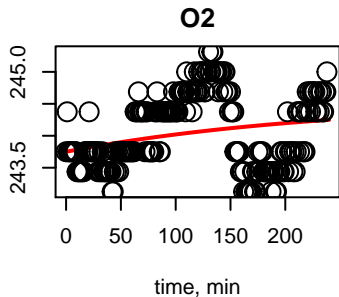

SAND DAY 1

**DIC**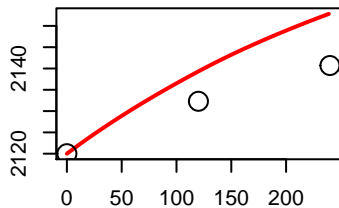

time, min

**NH4**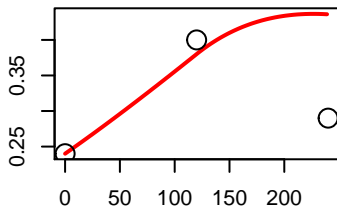

time, min

**NO3**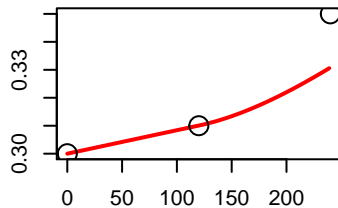

time, min

**AT**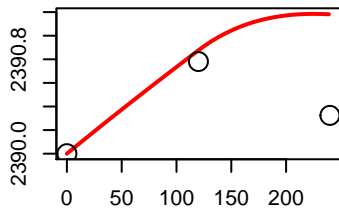

time, min

**O2**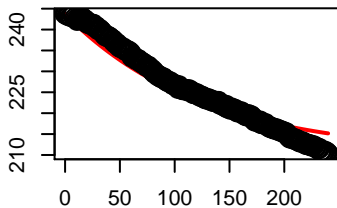

time, min

SAND NIGHT 1

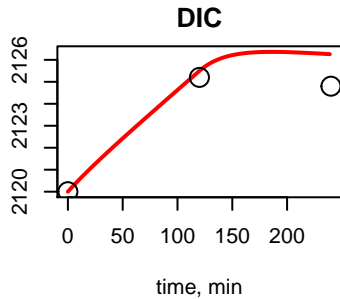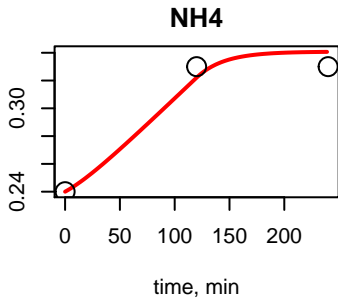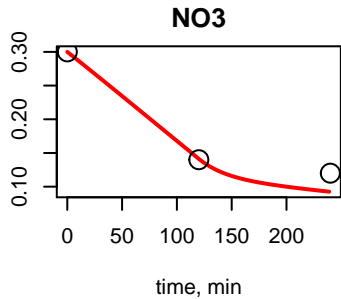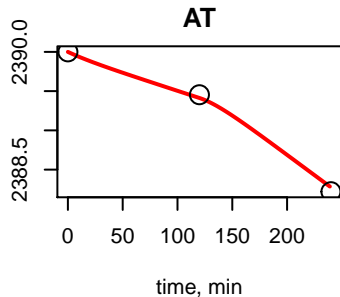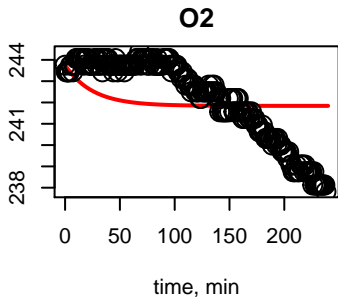

SAND DAY 2

**DIC**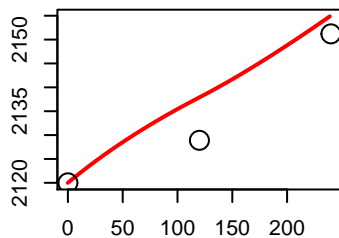

time, min

**NH4**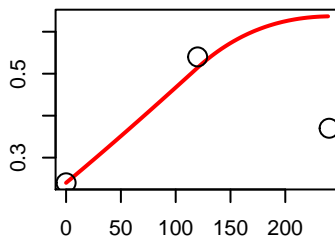

time, min

**NO3**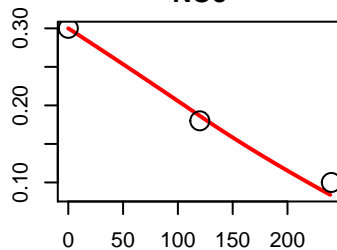

time, min

**AT**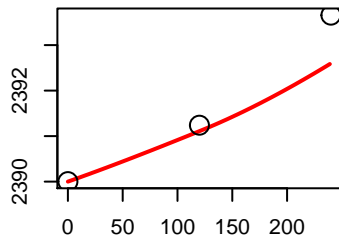

time, min

**O2**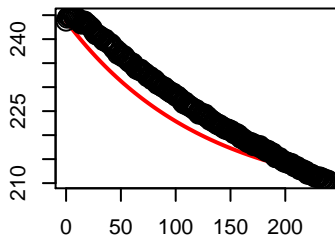

time, min

SAND NIGHT 2

**DIC**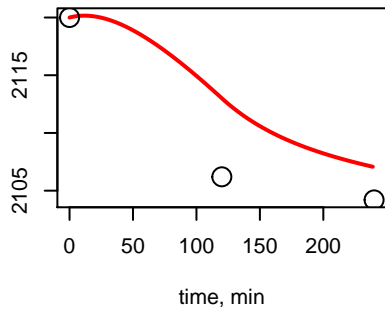**NH4**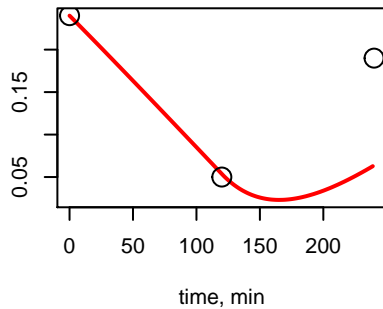**NO3**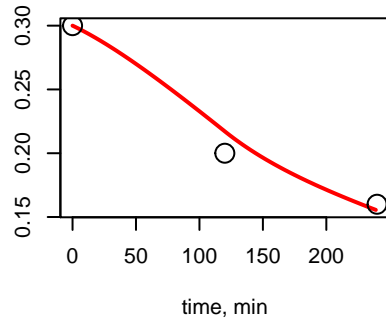**AT**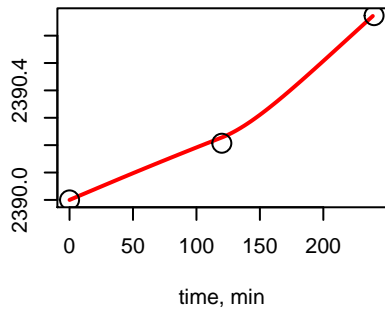**O2**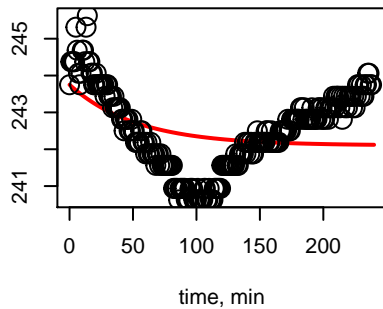

SAND DAY 3
