# Supplementary material for: Functional consequences of Caribbean coral reef habitat degradation
Source: Copernicus journal article supplement (doi:10.5194/bg-2021-64), 2021-03-23
Supplement: Supplementary file 1 [file Table_S1.xlsx]

## Sheet: Table S1
Tent	Taxonomic Group	Species	Cover (%)	Mean Production (g CaCO3 yr-1 colony-1)*	Mean Bioerosion (kg CaCO3 m-2 yr-1)*
Coral dominated tent 1	Coral	Pseudodiploria strigosa	12.7587	0.588146	-
		Colpophyllia natans	1.98682	0.501282	-
		Diploria labyrinthiformis	10.4905	0.586422	-
		Siderastrea siderea	2.31998	0.558064	-
		Agaricia humilis	0.213504	0.603975	-
		Dichocoenia stokesii	6.23928	0.238713	-
		Millepora alcicornis (Hydrozoa)	1.38179	0.107494	-
	Algae	Halimeda spp.	13.014	N/A	-
		Epilithic Algal Matrix	44.4385	-	-
		Crustose Coralline Algae	1.96901	0.0235	-
	Sponge	Cliona delitrix	2.12372	-	10.4755
	Other	Sand	3.05984	-	-
Coral dominated tent 2	Coral	Meandrina meandrites	9.25338	0.228863	-
		Diploria labyrinthiformis	21.118	0.586422	-
		Siderastrea siderea	3.84737	0.558064	-
	Algae	Dictyota spp.	9.55069	-	-
		Epilithic Algal Matrix	46.59	-	-
	Sponge	Desmapsamma anchorata	0.695323	-	-
		Cliona delitrix	0.8791	-	10.4755
		Scopalina ruetzleri	0.362106	-	-
	Other	Condylactis gigantea (Anemone)	1.59702	-	-
		Sand	6.10592	-	-
Coral dominated tent 3	Coral	Meandrina meandrites	5.77488	0.228863	-
		Pseudodiploria strigosa	23.0836	0.588146	-
		Siderastrea siderea	4.12149	0.558064	-
		Millepora complanata (Hydrozoa)	3.0183	0.450433	-
	Algae	Dictyota spp.	1.79138	-	-
		Epilithic Algal Matrix	41.5827	-	-
	Sponge	Cliona caribaea	2.24174	-	4.672
	Other	Sand	18.3859	-	-
Bioeroding Sponges Tent 1	Coral	Orbicella faveolata	2.25662	1.16863	-
		Agaricia humilis	2.04684	0.603975	-
		Porites asteroides	4.4303	0.67545	-
	Algae	Dictyota spp.	7.6875	-	-
		Epilithic Algal Matrix	32.7255	-	-
		Crustose Coralline Algae	2.62357	0.0235	-
	Sponge	Cliona delitrix	22.0597	-	10.4755
		Cliona caribbaea	5.50305	-	4.672
		Cliona aprica	11.9767	-	3.7595
		Scopalina ruetzleri	1.30016	-	-
	Other	Sand	7.38873	-	-
Bioeroding Sponges Tent 2	Coral	Siderastrea siderea	2.94065	0.558064	-
		Agaricia humilis	1.28079	0.603975	-
	Algae	Dictyota spp.	7.35346	-	-
		Epilithic Algal Matrix	39.9267	-	-
		Crustose Coralline Algae	2.55635	0.0235	-
	Sponge	Cliona delitrix	28.1865	-	10.4755
		Cliona aprica	9.65284	-	3.7595
		Desmapsamma anchorata	0.204791	-	-
		Chondrilla caribensis	3.77236	-	-
	Other	Sand	4.12555	-	-
Bioeroding Sponges Tent 3	Coral	Agaricia agaricites	0.944682	0.603975	-
	Algae	Dictyota spp.	5.37665	-	-
		Epilithic Algal Matrix	48.5626	-	-
		Crustose Coralline Algae	1.69897	0.0235	-
	Sponge	Cliona delitrix	26.3579	-	10.4755
		Cliona caribbaea	7.23441	-	4.672
		Cliona aprica	4.66235	-	3.7595
	Other	Sand	5.16245	-	-
Epilithic Algal Matrix Tent 1	Algae	Dictyota spp.	9.43523	-	-
		lobophora spp.	5.79699	-	-
		Epilithic Algal Matrix	67.8321	-	-
		Crustose Coralline Algae	1.24226	0.0235	-
	Other	Sand	15.6934	-	-
Epilithic Algal Matrix Tent 2	Algae	Dictyota spp.	14.7923	-	-
		Epilithic Algal Matrix	60.7393	-	-
	Other	Sand	24.4683	-	-
Epilithic Algal Matrix Tent 3	Algae	Dictyota spp.	12.0342	-	-
		lobophora spp.	9.23116	-	-
		Epilithic Algal Matrix	50.8066	-	-
		Crustose Coralline Algae	2.45621	0.0235	-
	Sponge	Scopalina ruetzleri	0.955125	-	-
	Other	Sand	24.5118	-	-
Benthic Cyanobacterial Mats Tent 1	Algae	Epilithic Algal Matrix	8.12225	-	-
	Other	Benthic cyanobacterial mats	90.5504	-	-
		Sand	1.33125	-	-
Benthic Cyanobacterial Mats Tent 2	Algae	Epilithic Algal Matrix	3.33524	-	-
	Other	Benthic cyanobacterial mats	89.4991	-	-
		Sand	7.16568	-	-
Benthic Cyanobacterial Mats Tent 3	Algae	Epilithic Algal Matrix	4.52353	-	-
	Other	Benthic cyanobacterial mats	82.903	-	-
		Sand	12.5735	-	-
Sand Tent 1	Other	Sand	100	-	-
Sand Tent 2	Other	Sand	100	-	-
Sand Tent 3	Other	Sand	100	-	-
*Mean estimated species-specific rates from the ReefBudget methodological approach (https://geography.exeter.ac.uk/reefbudget/caribbean/)

## Sheet: Description
Table S1 depicts the species composition of incubated subsrates and mean estimated species-specific rates from the ReefBudget methodological approach (https://geography.exeter.ac.uk/reefbudget/caribbean/)
