# Supplementary material for: Functional consequences of Caribbean coral reef habitat degradation
Source: Copernicus journal article supplement (doi:10.5194/bg-2021-64), 2021-03-23
Supplement: Supplementary file 2 [file Table_S2.xlsx]

## Sheet: Table S2
Type of Substrate	Light Regime	Replicate	Parameters	Estimated value (µmol kg-1min-1)	Standard Error	p-value
BES	Night	1	Primary Production	0*
			Mineralisation	1.27	0.004	<0.001
			Net Community Calcification	-0.03	0.01	0.002
			Nitrification	0.06	0.0002	<0.001
			pDeni	0.06	0.0002	<0.001
			Pnh4	x
			OC	1.3*
			NCratio	0.05*
			Leak	0.02*
		2	Primary Production	0*
			Mineralisation	0.89	0.008	<0.001
			Net Community Calcification	-0.044	0.03	0.13
			Nitrification	0.01	0.002	<0.001
			pDeni	0.012	0.004	0.007
			Pnh4	x
			OC	2*
			NCratio	0.017*
			Leak	0.02*
BES	Day	1	Primary Production	1.23	0.05	<0.001
			Mineralisation	1.27†
			Net Community Calcification	0.048	0.05	0.088
			Nitrification	0.06	0.03	0.047
			pDeni	0*
			Pnh4	0.54	0.27	0.049
			OC	1.2*
			NCratio	0.1*
			Leak	0.019*
		2	Primary Production	1.03	0.001	<0.001
			Mineralisation	0.89†
			Net Community Calcification	0.016	0.01	0.013
			Nitrification	0.0003	0.059	0.997
			pDeni	0*
			Pnh4	0.99	0.004	<0.001
			OC	2.5*
			NCratio	0.02*
			Leak	0.015*
		3	Primary Production	0.88	0.001	<0.001
			Mineralisation	0.9†
			Net Community Calcification	0.026	0.044	0.112
			Nitrification	0.002	0.044	0.97
			pDeni	0*
			Pnh4	0.96	0.03	<0.001
			OC	2*
			NCratio	0.07*
			Leak	0.018*
CORAL	Night	1	Primary Production	0*
			Mineralisation	0.88
			Net Community Calcification	-0.002	0.0005	<0.001
			Nitrification	0.02	0.0001	<0.001
			pDeni	0.03	0.0004	<0.001
			Pnh4	x
			OC	1.6*
			NCratio	0.025*
			Leak	0.018*
		2	Primary Production	0*
			Mineralisation	0.99	0.005	<0.001
			Net Community Calcification	0.003	0.002	0.127
			Nitrification	0.008	0.0004	<0.001
			pDeni	0.008	0.001	<0.001
			Pnh4	x
			OC	1.6*
			NCratio	0.009*
			Leak	0.025*
CORAL	Day	1	Primary Production	0.92	0.003	<0.001
			Mineralisation	0.8†
			Net Community Calcification	0.02	0.05	0.71
			Nitrification	0*
			pDeni	0*
			Pnh4	0.85	0.02	<0.001
			OC	1.2*
			NCratio	0.02*
			Leak	0.011*
		2	Primary Production	1.04	0.009	<0.001
			Mineralisation	0.8†
			Net Community Calcification	0.03	0.14	0.862
			Nitrification	0*
			pDeni	0*
			Pnh4	0.79	0.12	<0.001
			OC	1*
			NCratio	0.027*
			Leak	0.03*
		3	Primary Production	0.87	0.01	<0.001
			Mineralisation	0.8†
			Net Community Calcification	0.04	0.12	0.741
			Nitrification	0*
			pDeni	0*
			Pnh4	0.93	0.03	<0.001
			OC	1*
			NCratio	0.028*
			Leak	0.027*
BCM	Night	1	Primary Production	0*
			Mineralisation	0.65	0.002	<0.001
			Net Community Calcification	-0.027	0.005	<0.001
			Nitrification	0.008	0.001	<0.001
			pDeni	0.0004	0.003	0.906
			Pnh4	x
			OC	1.7*
			NCratio	0.02*
			Leak	0.012*
		2	Primary Production	0*
			Mineralisation	0.98	0.008	<0.001
			Net Community Calcification	-0.05	0.009	<0.001
			Nitrification	0.025	0.004	<0.001
			pDeni	0.007	0.007	0.297
			Pnh4	x
			OC	1.3*
			NCratio	0.05*
			Leak	0.008*
BCM	Day	1	Primary Production	0.21	0.007	<0.001
			Mineralisation	0*
			Net Community Calcification	0.01	0.01	0.243
			Nitrification	0*
			pDeni	0*
			Pnh4	0
			OC	2*
			NCratio	0.01*
			Leak	0.008*
		2	Primary Production	0.47	0.008	<0.001
			Mineralisation	0*
			Net Community Calcification	0.03	0.02	0.222
			Nitrification	0*
			pDeni	0*
			Pnh4	0.24	0.22	0.28
			OC	1.7*
			NCratio	0.047*
			Leak	0.008*
TMA	Night	1	Primary Production	0*
			Mineralisation	0.17	0.001	<0.001
			Net Community Calcification	-0.015	0.005	0.002
			Nitrification	0.001	0.0007	0.413
			pDeni	0.006	0.005	0.254
			Pnh4	x
			OC	1.4*
			NCratio	0.05*
			Leak	0.008*
		2	Primary Production	0*
			Mineralisation	0.18	0.001	<0.001
			Net Community Calcification	-0.001	0.0005	0.005
			Nitrification	0.004	0.0001	<0.001
			pDeni	0.023	0.003	<0.001
			Pnh4	x
			OC	3*
			NCratio	0.02*
			Leak	0.02*
TMA	Day	1	Primary Production	0.12	0.005	<0.001
			Mineralisation	0*
			Net Community Calcification	0*
			Nitrification	0*
			pDeni	0*
			Pnh4	0.7	0.18	<0.001
			OC	2.2*
			NCratio	0.02*
			Leak	0.02*
		3	Primary Production	0.28	0.004	<0.001
			Mineralisation	0*
			Net Community Calcification	0.016	0.029	0.586
			Nitrification	0*
			pDeni	0*
			Pnh4	0.86	0.48	0.076
			OC	1.5*
			NCratio	0.01*
			Leak	0.03*
SAND	Night	1	Primary Production	0*
			Mineralisation	0.19	0.0015	<0.001
			Net Community Calcification	-0.003	0.0009	0.0002
			Nitrification	0.0008	0.0004	0.02
			pDeni	0.005	0.002	0.038
			Pnh4	x
			OC	1.4*
			NCratio	0.01*
			Leak	0.008*
		2	Primary Production	0*
			Mineralisation	0.19	0.19	<0.001
			Net Community Calcification	-0.003	0.002	0.05
			Nitrification	0.001	0.001	0.4252
			pDeni	0.01	0.006	0.008
			Pnh4	x
			OC	1.6*
			NCratio	0.02*
			Leak	0.008*
SAND	Day	1	Primary Production	0.11	0.005	<0.001
			Mineralisation	0.1*
			Net Community Calcification	-0.004	0.009	0.682
			Nitrification	0.002	0.003	0.585
			pDeni	0*
			Pnh4	0.68	0.49	0.17
			OC	1.2*
			NCratio	0.06*
			Leak	0.004*
		2	Primary Production	0.09	0.005	<0.001
			Mineralisation	0.15*
			Net Community Calcification	0.004	0.007	0.564
			Nitrification	0.003	0.002	0.247
			pDeni	0.03	0.04	0.421
			Pnh4	1*
			OC	1.2*
			NCratio	0.05*
			Leak	0.04*
		3	Primary Production	0.1*
			Mineralisation	0.13	0.005	<0.001
			Net Community Calcification	-0.001	0.001	0.291
			Nitrification	0.002	0.002	0.397
			pDeni	0.02	0.03	0.3375
			Pnh4	1*
			OC	1*
			NCratio	0.02*
			Leak	0.019*

## Sheet: Description
Table S2 presents the model output for all incubations carried out on substrates dominated by coral, turf and macroalgae (TMA), bioeroding sponges (BES), benthic cyanobacterial mats and sand during the day and night. Values escorted by the star sign * relate to fixed parameters. The † symbol refers to fixed parameters estimated from the data of the same incubation at night (we assume similar mine…
