# Supplementary material for: Functional consequences of Caribbean coral reef habitat degradation
Source: Copernicus journal article supplement (doi:10.5194/bg-2021-64), 2021-03-23
Supplement: Supplementary file 3 [file Table_S3.xlsx]

## Sheet: Table S3
pairs	F	R2	p-value
BES vs Coral	0.744542	0.0851436	0.6
BES vs BCM	0.395873	0.0535262	0.691
BES vs TMA	1.09755	0.135541	0.402
BES vs Sand	1.03882	0.114929	0.464
Coral vs BCM	0.60824	0.0799449	0.488
Coral vs TMA	0.522158	0.0694161	0.566
Coral vs Sand	0.409693	0.0487168	0.611
BCM vs TMA	0.931645	0.134405	0.463
BCM vs Sand	1.45556	0.172142	0.304
TMA vs Sand	0.481528	0.0643622	0.628
Night vs Day	35.8123	0.630362	0.001

## Sheet: Description
Table S3 shows results from permutational multivariate analysis of variance (PERMANOVA) with pairwise contrasts. R-squared indicates the percentage of the variation in distances that is explained by the grouping being tested. The p-value indicates whether or not this result was likely a result of chance.
